# Supplementary material
Source: PubMed Central journal article supplement (PMC4721221)

## Supplementary Online Content

MacDonald SC, Bateman BT, McElrath TF, Hernández-Díaz S. Mortality and morbidity during delivery hospitalization among pregnant women with epilepsy in the United States. *JAMA Neurol*. Published online July 6, 2015. doi:10.1001/jamaneurol.2015.1017.

**eTable.** ICD-9-CM Codes

**eFigure 1.** Adjusted Odds Ratios of Obstetrical Outcomes in Women with and without Epilepsy at Delivery Admission

**eFigure 2.** Relative Frequencies of Obstetrical Outcomes in Women with and without Epilepsy at Delivery Admission

This supplementary material has been provided by the authors to give readers additional information about their work.

## Online-Only Supplement

eTable. ICD-9-CM Codes

eFigure 1. Adjusted Odds Ratios of Obstetrical Outcomes in Women with and without Epilepsy at Delivery Admission. CD = Cesarean Delivery, VD = Vaginal Delivery. Adjusted for maternal age, race, quartile of median household income for patient zip code, hospital location, hospital region, and year. Data weighted using sampling weights to achieve nationally representative estimates

eFigure 2. Relative Frequencies of Obstetrical Outcomes in Women with and without Epilepsy at Delivery Admission. CD = Cesarean Delivery, VD = Vaginal Delivery. Darker grey bar = Women with Epilepsy (WWE), Lighter grey bar = Women without Epilepsy (WWOE). Maternal death not shown because absolute risk too small to be viewed on this axis. Data weighted using sampling weights to achieve nationally representative estimates

**eTable. ICD-9-CM Codes**

| <b>Baseline Characteristics</b>                               |                                                                                    |
|---------------------------------------------------------------|------------------------------------------------------------------------------------|
| Multiple Births                                               | V27.2 – V27.7 651.xx                                                               |
| Previous Cesarean                                             | 654.2x                                                                             |
| Pre-existing Diabetes Mellitus                                | 648.0x 250.xx                                                                      |
| Chronic Renal Disease                                         | 581.xx-583.xx 585.x 587 646.2x                                                     |
| Pre-existing Hypertension                                     | 642.0x-642.2x 642.7x 401.x 402.xx-405.xx                                           |
| Depression                                                    | 296.2x 296.3x 300.4 311 298.0 309.0 309.1                                          |
| Alcohol/ Substance Abuse                                      | 291.xx 292.xx 303.xx-305.xx 648.3x 655.5x 965.0x<br>V65.42                         |
| <b>Psychiatric Disorders</b>                                  |                                                                                    |
| Psychotic Disorders                                           | 295.xx – 298.x, 293.81-293.82                                                      |
| Mood Disorders                                                | 293.83                                                                             |
| Anxiety Disorders                                             | 293.84, 300.xx                                                                     |
| Personality Disorders                                         | 301.xx                                                                             |
| Eating Disorders                                              | 307.1 307.51                                                                       |
| Adjustment Disorders                                          | 309.24 309.28 309.3 309.4 309.9                                                    |
| <b>Obstetrical Outcomes</b>                                   |                                                                                    |
| Cesarean delivery                                             | 74.0-74.2 74.4 74.99 669.7x                                                        |
| Induction of Labor                                            | 73.1 73.4                                                                          |
| <b>Pregnancy-related hypertension</b>                         |                                                                                    |
| Gestational hypertension                                      | 642.3x 642.9x                                                                      |
| Preeclampsia                                                  | 642.4x 642.5x 642.6x 642.7x                                                        |
| Eclampsia (Seizures among Preeclamptics)                      | 642.6x                                                                             |
| Antepartum Hemorrhage                                         | 641.1x 641.2x 641.3x 641.8x 641.9x                                                 |
| <b>Postpartum Hemorrhage</b>                                  |                                                                                    |
| Due to atony                                                  | 666.1x                                                                             |
| Not due to atony                                              | 666.0x 666.2x 666.3x                                                               |
| Severe Postpartum Hemorrhage                                  | [666.0x-666.3x] plus either blood transfusion [99.0x] or hysterectomy [68.3x-68.9] |
| Gestational diabetes                                          | 648.8x                                                                             |
| Preterm labor                                                 | 644.2x                                                                             |
| Premature Rupture of Membranes                                | 658.1x                                                                             |
| Chorioamnionitis                                              | 658.4x                                                                             |
| Poor Fetal growth                                             | 656.5x                                                                             |
| Excessive fetal growth                                        | 656.6x                                                                             |
| Fetal distress                                                | 656.3x, 659.7x                                                                     |
| <b>Fetal abnormalities</b>                                    |                                                                                    |
| Central nervous system malformations                          | 655.0x                                                                             |
| Chromosomal abnormalities                                     | 655.1x                                                                             |
| Hereditary disease in family possible affecting fetus         | 655.2                                                                              |
| Suspected damage due to viral or other diseases in the mother | 655.3x 655.4x                                                                      |
| Suspected damage due to drugs or radiation                    | 655.5x 655.6x                                                                      |
| Decreased fetal movements                                     | 655.7x                                                                             |
| Other/unspecified abnormalities                               | 655.8x 655.9x                                                                      |
| Stillbirth                                                    | V27.1, V27.3, V27.4, V27.6, V27.7, 656.4x                                          |

**eFigure 1. Adjusted Odds Ratios of Obstetrical Outcomes in Women with and without Epilepsy at Delivery Admission.**

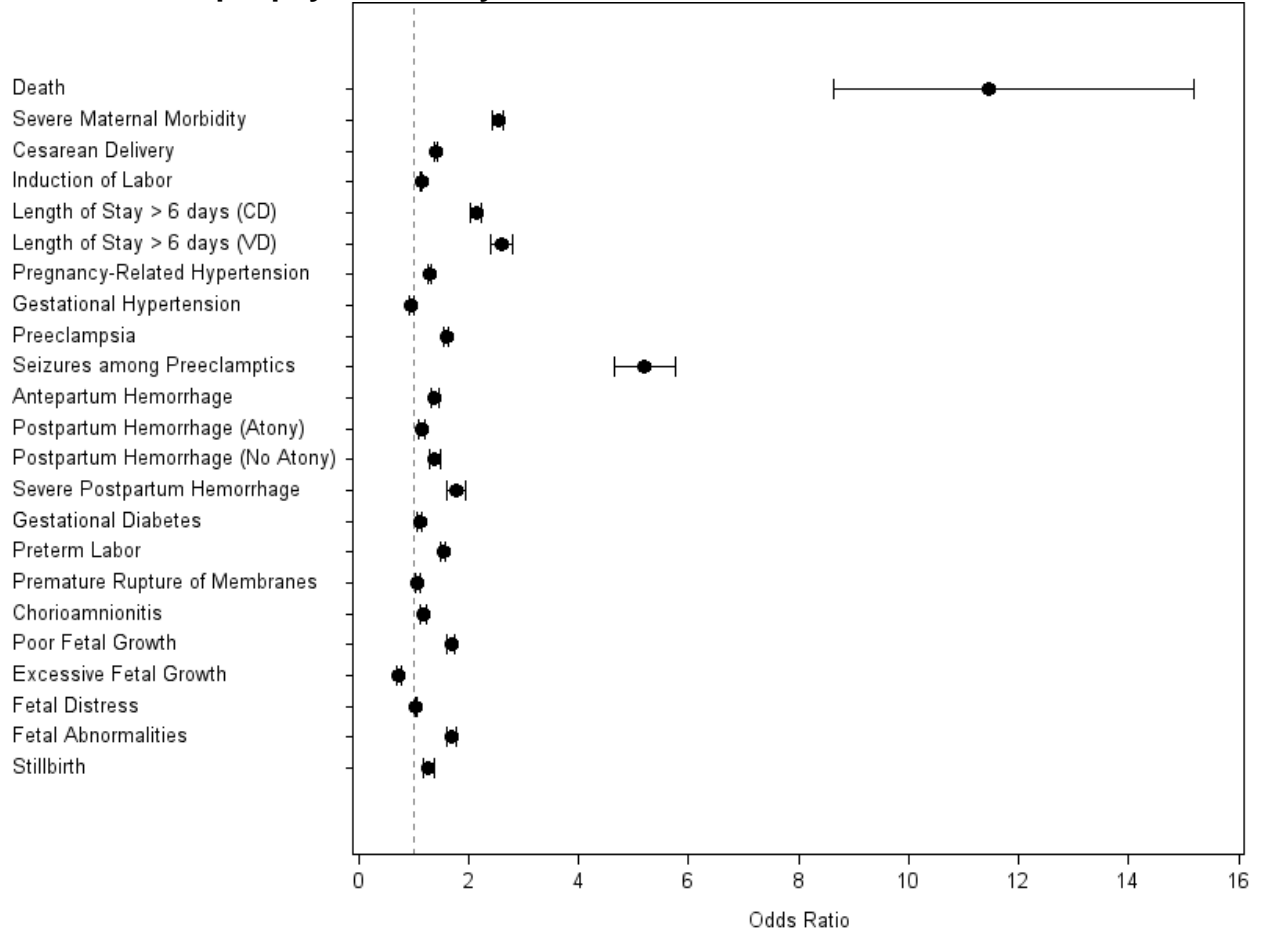

**eFigure 2. Relative Frequencies of Obstetrical Outcomes in Women with and without Epilepsy at Delivery Admission.**

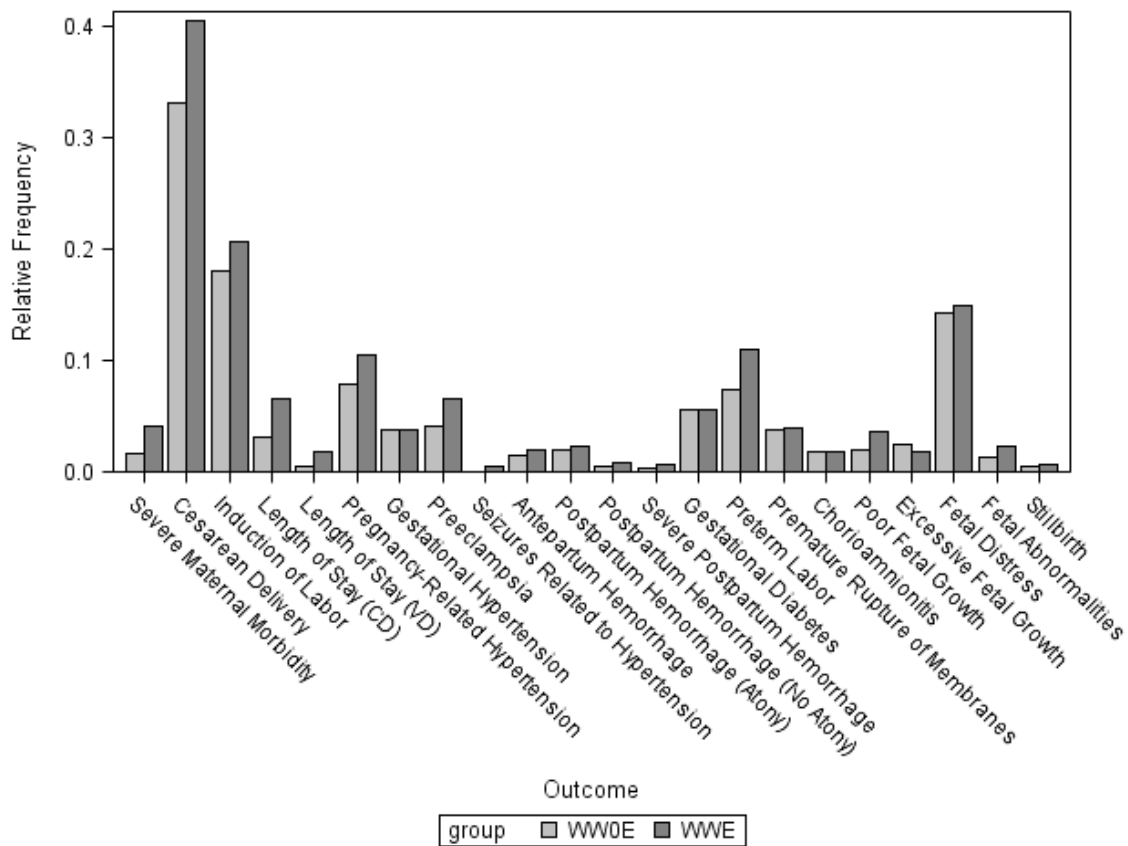

Supplement: NIHMS750328-supplement-Supplemental_material.pdf [file NIHMS750328-supplement-Supplemental_material.pdf]
